# Supplementary material
Source: MDPI journal article supplement (https://www.mdpi.com/2624-5558/5/2/9)
Supplement: s1 [file s1]

Archive with 1 entries (1 files):
- cmd-2898038-supplementary.pdf
